# Supplementary material for: miR-148b-3p inhibits gastric cancer metastasis by inhibiting the Dock6/Rac1/Cdc42 axis
Source: Springer Nature journal article supplement (doi:10.1186/s13046-018-0729-z), 2018-03-27

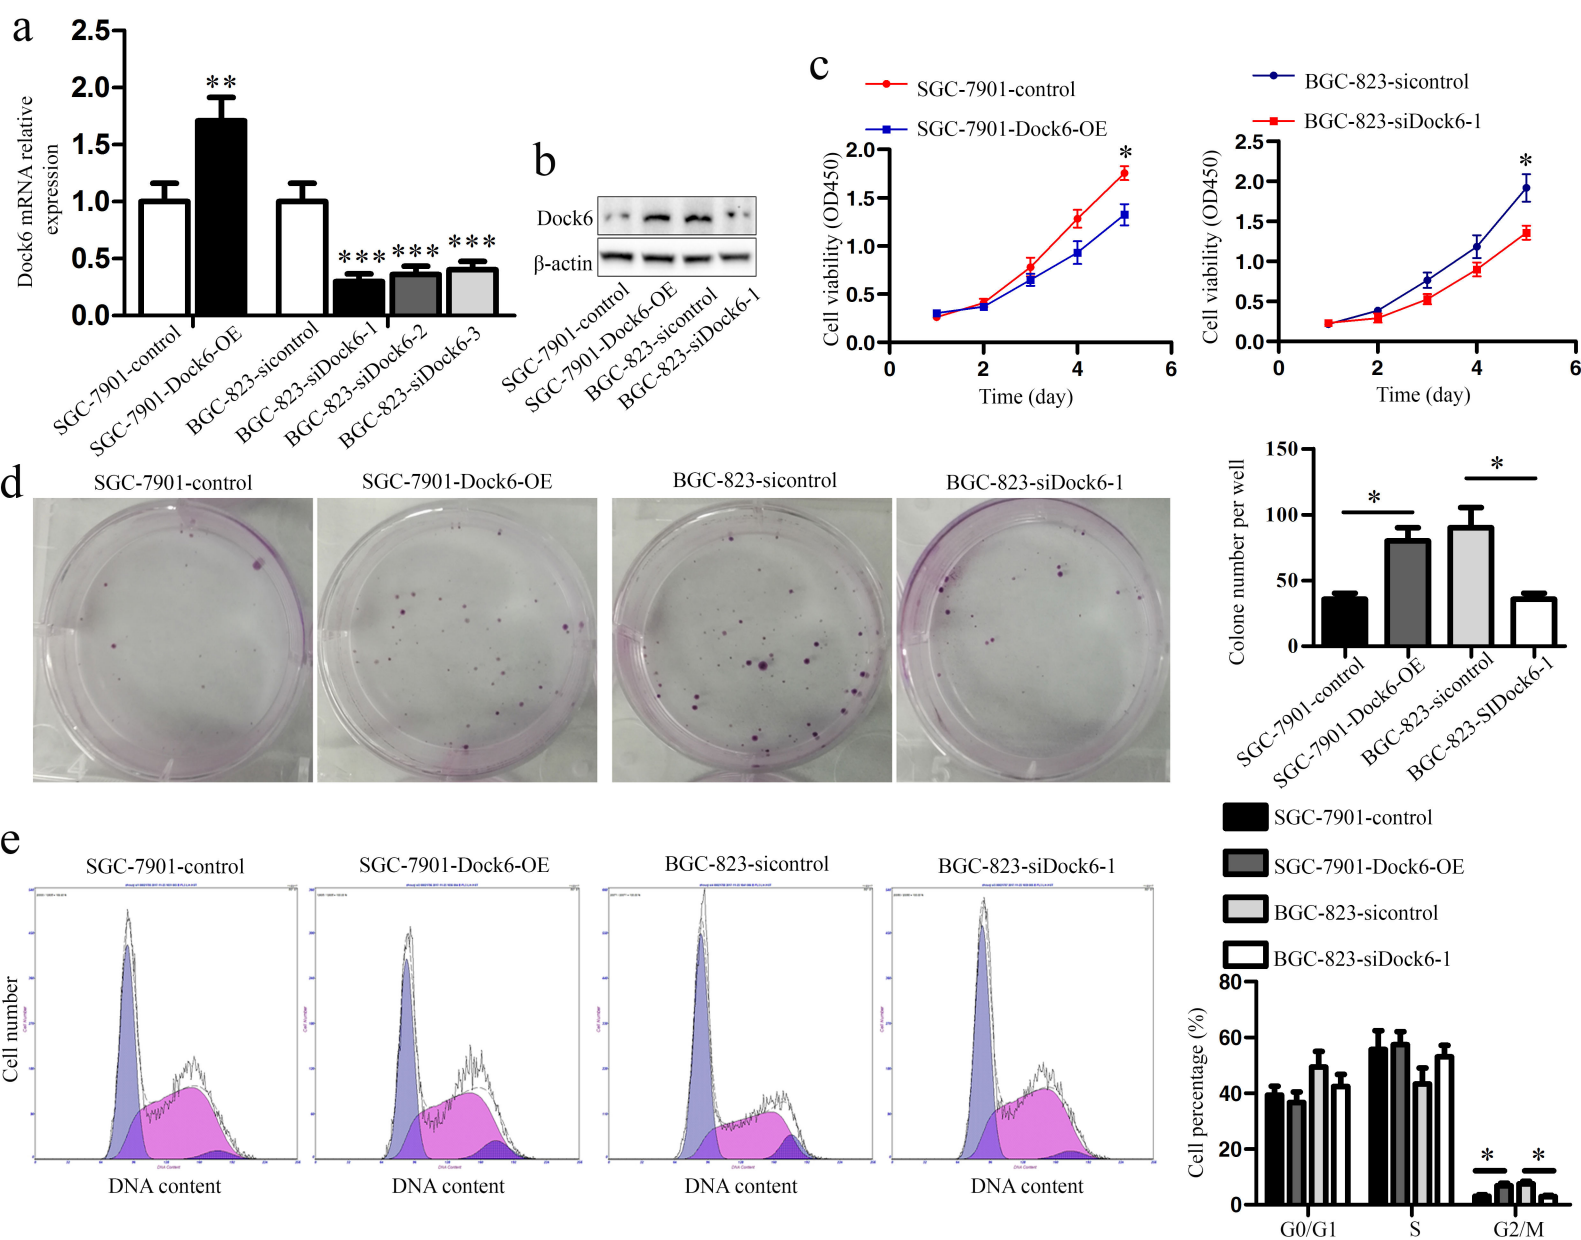

Supplement: MOESM6 [file 15571586]
